# Supplementary material for: Abnormal brown adipose tissue mitochondrial structure and function in IL10 deficiency
Source: PubMed Central journal article supplement — eBioMedicine. 2018 Nov 27;39:436–47. doi: 10.1016/j.ebiom.2018.11.041 (PMC6355943; doi:10.1016/j.ebiom.2018.11.041), 2018-11-27
Supplement: mmc1.pdf [file mmc1.pdf]

Supplementary data

## Abnormal brown adipose tissue mitochondrial structure and function in IL10 deficiency

José C. de-Lima-Júnior<sup>1,2</sup>, Gabriela F. Souza<sup>1,2</sup>, Alexandre Moura-Assis<sup>1,2</sup>, Rodrigo S. Gaspar<sup>2,3</sup>, Joana M. Gaspar<sup>1,2</sup>, Andréa L. Rocha<sup>4</sup>, Danilo L. Ferrucci<sup>5,6</sup>, Tanes I. Lima<sup>2,4</sup>, Sheila C. Victório<sup>1,2</sup>, Ivan L. P. Bonfante<sup>7</sup>, Claudia R. Cavaglieri<sup>7</sup>, José C. Pareja<sup>8</sup>, Sérgio Q. Brunetto<sup>9</sup>, Celso D. Ramos<sup>2,10</sup>, Bruno Geloneze<sup>2,8</sup>, Marcelo A. Morí<sup>4</sup>, Leonardo R. Silveira<sup>2,4</sup>, Gesmar R. S. Segundo<sup>11</sup>, Eduardo R. Ropelle<sup>2,3</sup>, Lício A. Velloso<sup>1,2\*</sup>

### Materials and methods

#### PET/CT image analyse in mice

Images were acquired and processed using ALBIRA, a small animal PET/SPECT/CT in vivo imaging system (Bruker® Corporation, Massachusetts, USA) and analyzed using a PMOD workstation, also from Bruker®. (18F)-FDG was obtained from the Nuclear and Energy Research Institute (IPEN, Sao Paulo, Brazil). Mice were anesthetized with 2% isoflurane and injected in the venous sinus with 5 MBq of 2-deoxy-2-[18F]fluoro-d-glucose ([18F]FDG). Mice were kept awake and exposed at 4 °C during uptake period of 60 minutes. The computed tomography was performed as a low-dose acquisition with 80 kVp, 160 µA, and 1024 projections, during 0.8s per CT rotation, pitch 4.0 – 5.0 mm, field of view of 71.3mm and a scan speed of 24.6 mm/s. The PET scan was performed immediately after the CT scan without changing the position of the mice, always in the craniocaudal direction from head to proximal thighs. After 60 minutes of [18F]FDG uptake, PET scans were started for a total duration of 40 min. PET scans were reconstructed using the PMOD in LabPET software and images were calibrated in Bq per mL by scanning a phantom cylinder. Regions of interest (ROI) were drawn on surrounding slices on CT scans and reconstructed as three-dimensional volumes to measure densities and uptake of each desired tissue. Then, PET images were processed and converted

into standardized uptake values (SUVs) adjusted by body weight of each animal and superimposed on the CT anatomical image to measure [18F]FDG uptake in the indicated tissue.

### ***In vivo* Multiphoton Redox and Fluorescence Lifetime Imaging (FLIM)**

Before imaging, the mice were anesthetized with an intraperitoneal injection of a mixture of ketamine (200mg / kg), xylazine (5mg / kg) and diazepam, and the interscapular BAT was dissected rapidly and then minced into very small fragments in a chambered coverglass for acquiring images. The multiphoton images were obtained with the Zeiss LSM780-NLO com Becker&Hickl Photon Counting at the University of Campinas. The source was a titanium sapphire laser. A FLIM image z-stack was collected from the same tissue volume at 890-nm excitation. Single photon counting was accomplished at a rate of  $5 \times 10^4$  photons per second. We used SPCImage software (Becker and Hickl) to evaluate the fluorescence lifetime decay curves. The redox ratio was calculated dividing FAD fluorescence intensity by NADH fluorescence intensity, pixel by pixel, using ImageJ.

### **Quantitative RT-PCR**

Total RNA was extracted from mouse BAT by using TRIzol reagent (Invitrogen) according to the manufacturer's recommendations. The cDNA synthesis was performed using 2.0 µg of total RNA according the manufacturer's instructions (High Capacity cDNA Reverse Transcription Kit, Life Technologies). Each PCR contained 25–40 ng of reverse-transcribed RNA, 0.25 µl of each specific primer, Taqman Universal master mix (Life Technologies), and RNase-free water to a 10 µl final volume. Real time PCR analysis of gene expression was carried out in an ABI Prism 7500 sequence detection system (Applied Biosystems). Primers were purchased from Applied Biosystems or Integrated DNA Technologies. Relative gene expression was normalized to that of GAPDH in all samples according to the  $\Delta\Delta C_t$  method. Real-time data were analyzed using the Sequence Detector System 1.7 (Applied Biosystems). The nucleotide sequences of the primers are: Pgc-1 $\alpha$  - Forward primer (5'-3') – AGCCGTGACCACTGACAACGAG and Reverse

primer (5'-3') – GCTGCATGGTTCTGAGTGCTAAG; Ucp1 - Forward primer (5'-3') GGCCTCTACGACTCAGTCCA and Reverse primer (5'-3') – TAAGCCGGCTGAGATCTTGT.

### **Rectal temperature and interscapular brown adipose tissue thermal release**

To evaluate core temperature we performed the measurements using a digital thermometer (BAT-7001H, Clifton, NJ, USA) in combination with a copper-constantan thermocouple rectal probe (RET-3) obtained from Physitemp Instruments (Clifton, NJ, USA). The probe was petroleum jelly-lubricated before being positioned in the rectum at 2-2.5 cm for 1 second. Measurements were taken every hour after exposure to cold. For the detection of interscapular brown adipose tissue thermal release, an infrared (IR) camera (FLIR T450sc, FLIR Systems, Inc. Wilsonville, USA) was employed to obtain surface images of each mouse with an IR resolution of 320 × 240 pixels and a Thermal sensitivity / NETD of <40 mK @ +30 ° C (+ 86 ° F). Images were presented in rainbow high contrast form available in the color palette of the free software FLIR Tools IR.

### **Metabolic phenotyping and locomotor activity.**

The physiological markers of energy expenditure ( $O_2$  consumption,  $CO_2$  production, RER, heat rate, and ambulatory activity) were measured using an open circuit calorimeter system, the LE405 Gas Analyzer (Panlab – Harvard Apparatus, Holliston, MA, USA), which was calibrated as recommended by the manufacturer. Mice were acclimated for 24 h in the apparatus, and thereafter, data were recorded for 24 h (light and dark periods).

## Supplementary Figures

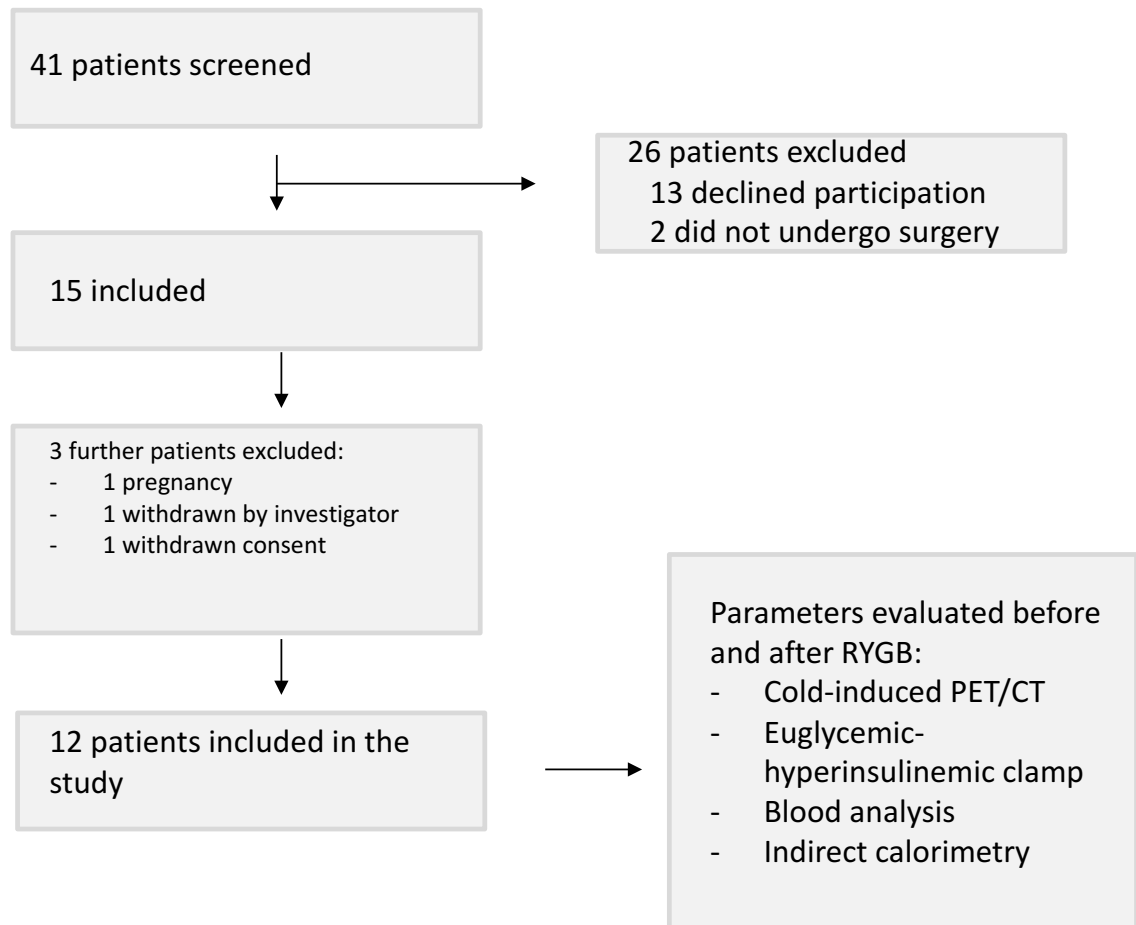

**Supplementary Figure 1.** Flow diagram of obese volunteers submitted to Roux-in-Y gastric bypass (RYGB).



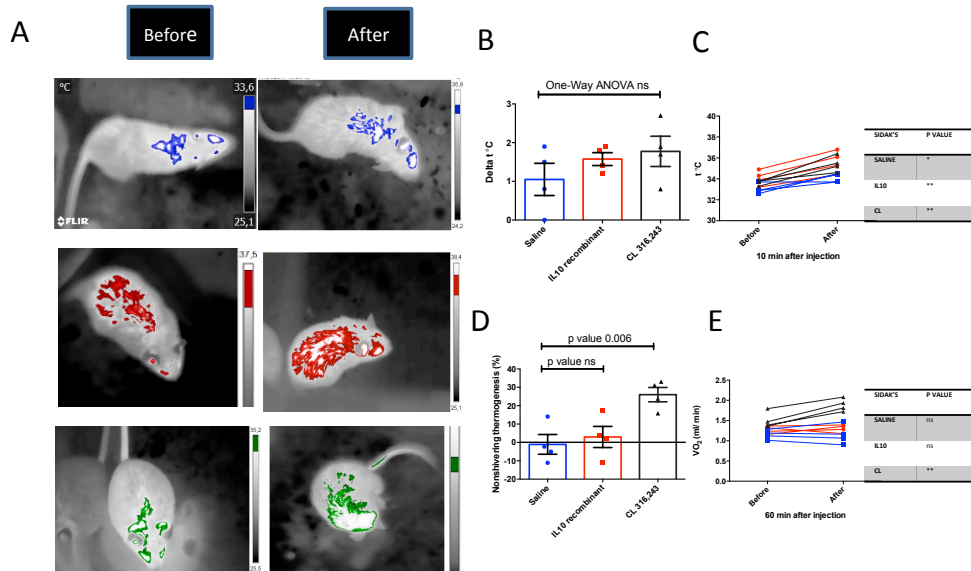

Acute treatment of immortalized primary adipocyte precursor cells

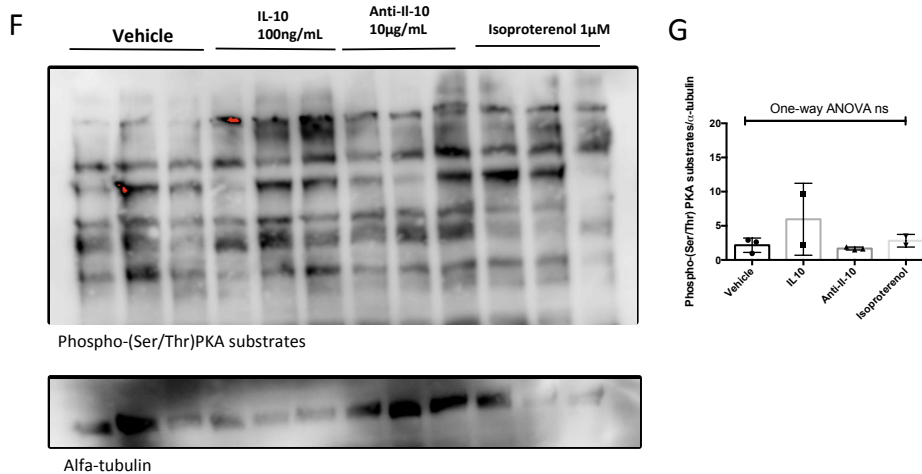

**Supplementary Figure 3. No acute thermogenic response to IL10 treatment.** Male WT mice were treated with saline, recombinant IL10 (10 µg/kg/dose) or the  $\beta_3$ -agonist CL316,243 (1mg/kg/day) to evaluate acute thermogenic response after IL10. **A**, Representative surface infrared iBAT temperature image before and after indicated treatment. **B**, Surface infrared iBAT temperature before and after indicated treatment. **C**, Surface infrared iBATdelta temperature before and after indicated treatment. **D**, Whole body  $O_2$  consumption before and after indicated treatment. **E**, Nonshivering thermogenesis calculated from (D) data. **F**, Acute treatment of immortalized primary brown adipocyte precursor cells. Western blot representative image measuring Phospho-(Ser/Thr) PKA Substrates after indicated treatments. **G**, Densitometry quantification of Phospho-(Ser/Thr) PKA Substrates normalized by alfa tubulin. N = 3 per condition. Ordinary one-way ANOVA was performed.

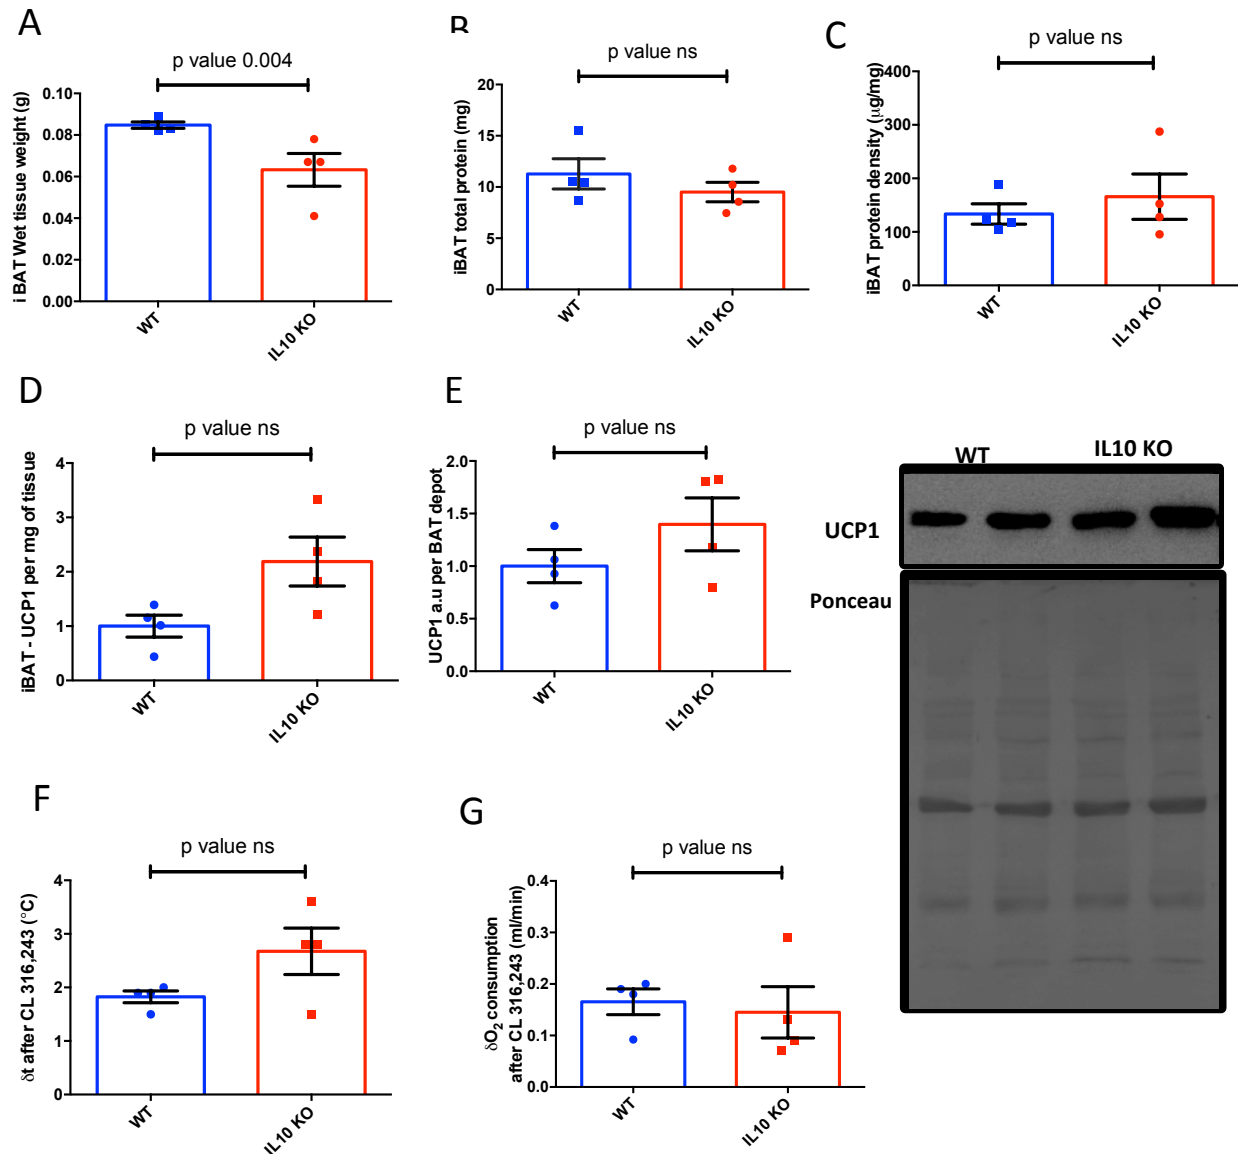

**Supplementary Figure 4. IL10 KO mice have preserved thermogenic capacity.** **A**, Wet tissue weight of BAT. **B**, iBAT total protein content. **C**, iBAT protein density. **D**, UCP1 per mg of tissue. **E**, UCP1 total content per depot calculated as **B** multiplied by **C**. WT was normalized to 1. The Representative western blot image measuring UCP1 is depicted in the right-hand bottom corner of the figure. N = 4 per condition. After stripping, this membrane was the same used to blot anti-OPA1 and Mfn 2 (Fig. 4H), TFAM and OXPHOS (Supp. Fig. 6 A). The loading control used is the same, as indicated in supplementary material with details about cut blots. **F**, Change in iBAT temperature during a BAT thermogenic capacity analysis using CL-induced thermogenesis test in awake mice. **G**, Change in O<sub>2</sub> consumption during a BAT thermogenic capacity analysis using CL-induced thermogenesis test in awake mice. Data indicate means ± SEM. N = 4 mice per condition. Student's unpaired t-test was performed. \* p < 0.05

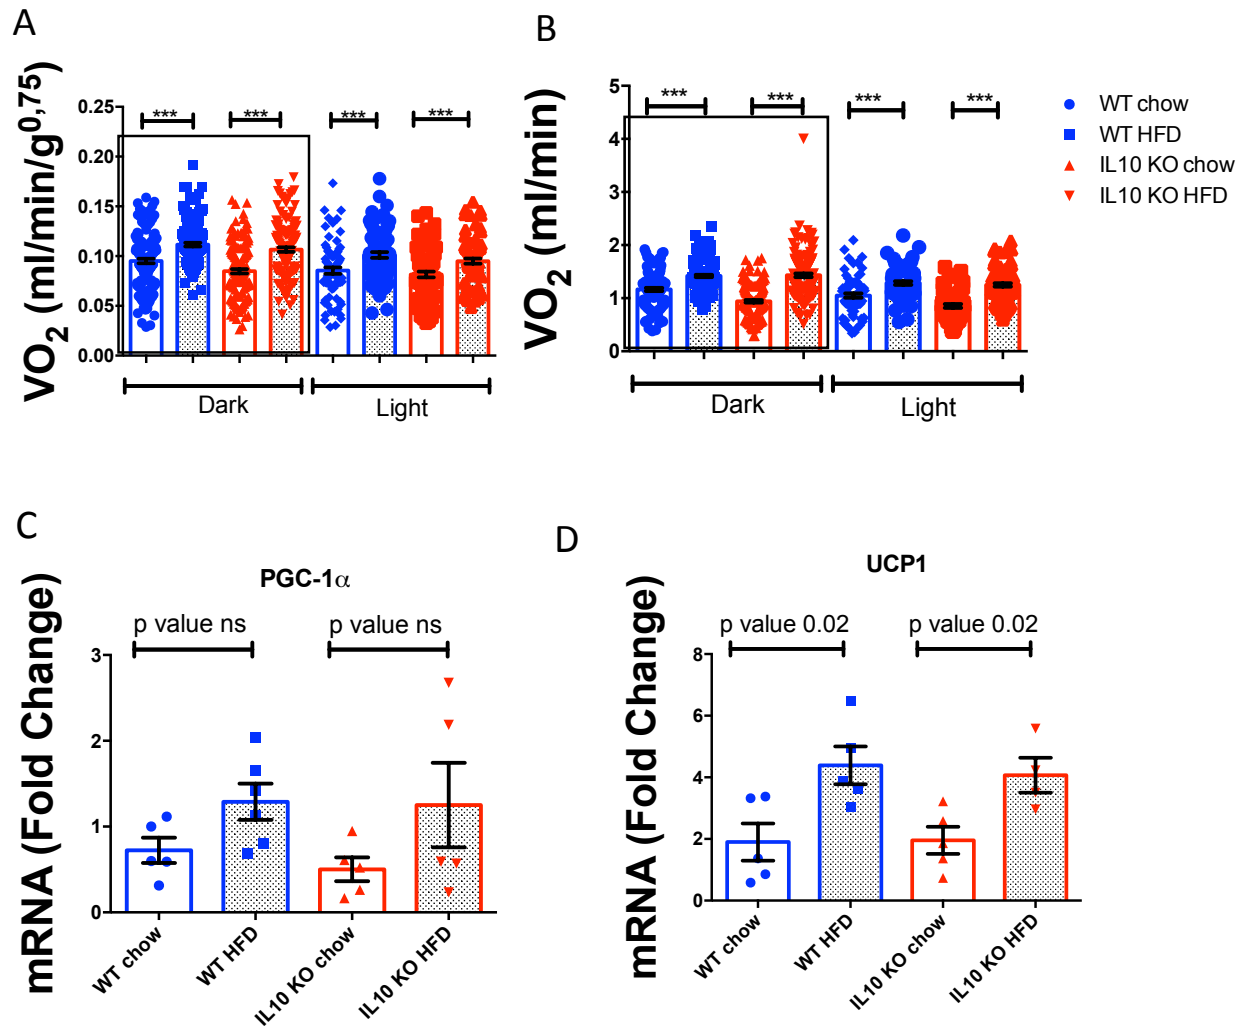

**Supplementary Figure 5. IL10 KO mice have preserved diet-induced thermogenesis. A-B,** Effect of high-fat diet on oxygen consumption (VO<sub>2</sub>) in awake male WT mice. N = 4. **C,** Effect of high-fat diet on PGC-1 $\alpha$  mRNA levels in awake male WT mice and IL10KO mice. N = 5 per condition. **D,** Effect of high-fat diet on Ucp1 mRNA levels in awake male WT mice and IL10KO mice. N = 5 per condition. Data indicate means  $\pm$  SEM. \*p  $\leq$  0.05; \*\*p  $\leq$  0.01; \*\*\*p  $\leq$  0.001, Statistical analysis was performed using Student's unpaired t test.



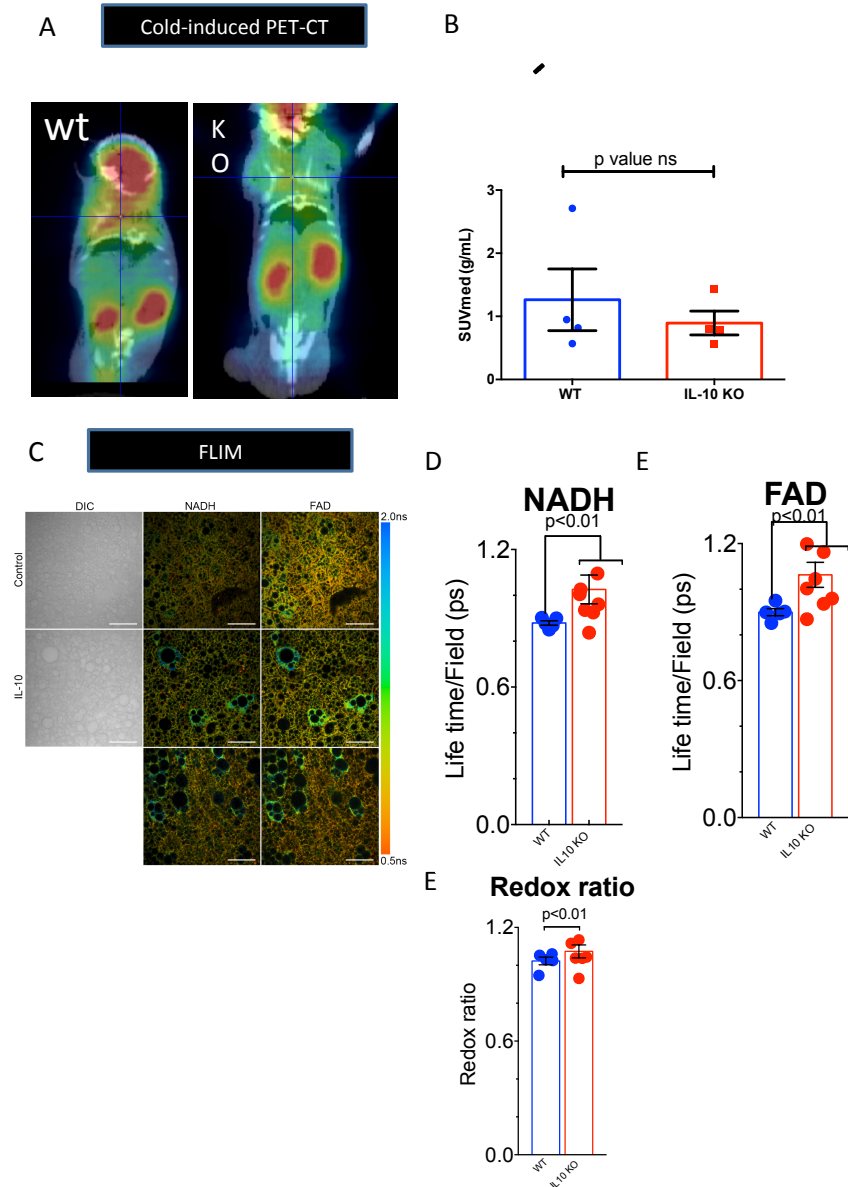

**Supplementary Figure 6. Assessment of iBAT glycolysis using  $^{18}\text{F}$ -FDG PET/CT and analysis of metabolic status using FLIM.** **A**, Representative image and quantification of 2h cold-stimulated iBAT  $^{18}\text{F}$ -FDG uptake (SUVmax) in WT and IL10 KO mice. **B**, Representative fluorescence lifetime imaging obtained using ex vivo iBAT from WT and IL10 KO mice. **C**, FLIM of autofluorescent NADH. **D**, FLIM of autofluorescent FAD. **E**, Reduction-oxidation pair NADH:NAD<sup>+</sup> (redox ratio) between WT and IL10 KO mice. In **A**,  $n = 4$ . In **B-E**,  $n = 5$ . Data indicate means  $\pm$  SEM. **\*\*** $p \leq 0.01$ . Statistical analysis performed using Student's unpaired t test.

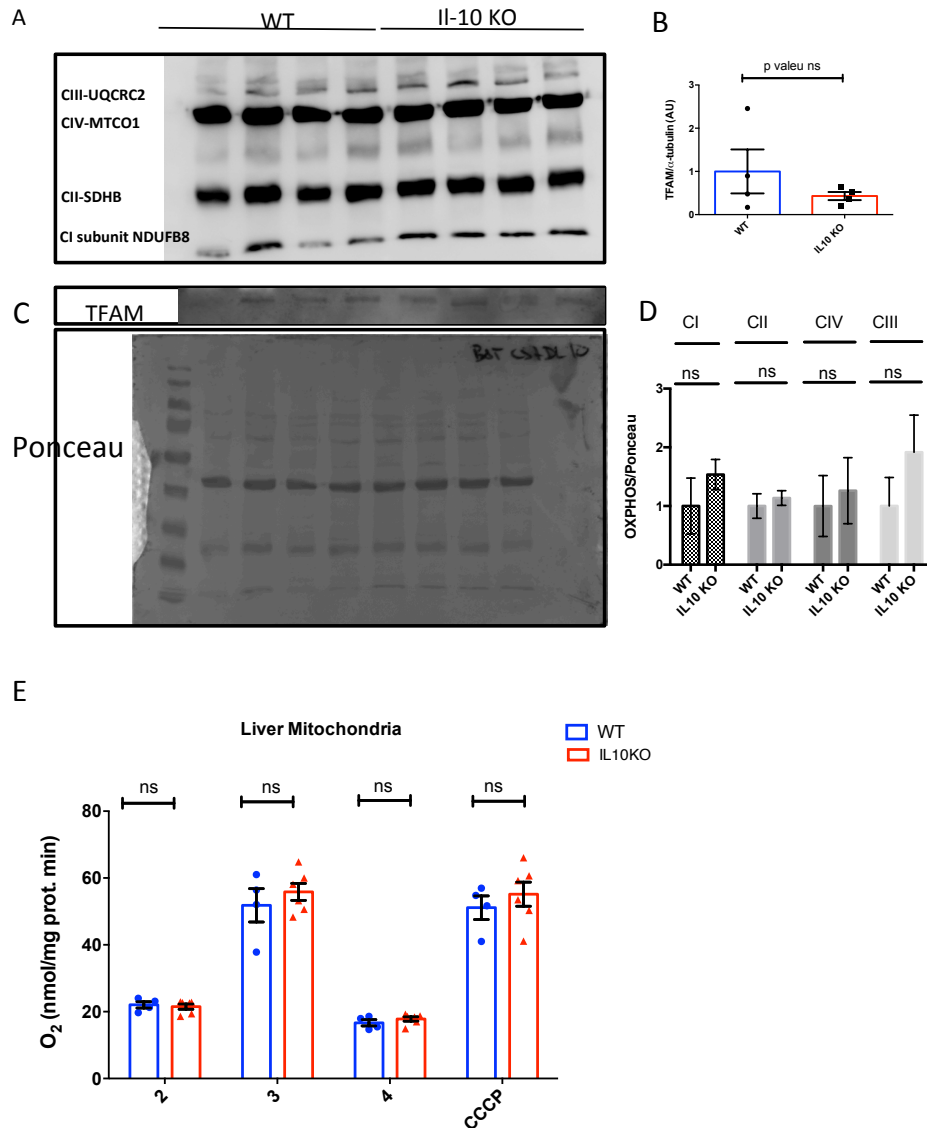

**Supplementary Figure 7. Analysis of OXPHOS complex proteins and liver mitochondria respiration.** **A-D**, Representative Western blot image of OXPHOS complex proteins and TFAM in iBAT from WT and IL10 KO mice. N = 4 per condition. *After stripping, this membrane was the same used to blot anti-OPA1 and Mfn 2 (Fig. 4H), and anti-UCP1 (Supp. Fig. 4E).* The loading control used is the same, as indicated in supplementary material with details about cut blots. N = 4 per condition. **E**, Quantification of complex I-driven (pyruvate-malate) oxygen consumption rates (OCR) in liver isolated mitochondria from wild type (WT) and IL10 KO mice. State 2 quantifies no-ATP synthesis-related respiration (proton leak). State 3 quantifies OCR coupled to maximal ATP synthesis. State 4 oligo quantifies rate of basal non-phosphorylating oxygen consumption after oligomycin and state 3u quantifies maximal respiration induced by FCCP. Bar graphs show average  $\pm$  SEM per experiment (n= 3 - pool of 3 mice per group). Statistical analysis was performed using Student's t-test, unpaired; two-way ANOVA was performed using Sidak's test,  $p < 0.05$ .

## Supplementary Tables

**Supplementary Table 1. Clinical trials on going targeting brown adipose tissue**

| Study title                                                                                                            | Identifier  | Intervention                                |
|------------------------------------------------------------------------------------------------------------------------|-------------|---------------------------------------------|
| Longitudinal Follow-up of Brown Adipose Tissue Function and Structure                                                  | NCT01985503 | Observational                               |
| The Effects of Capsinoids on Brown Adipose Tissue Activation in Obesity                                                | NCT03110809 | Capsinoid vs placebo                        |
| Study of the Effect of Vagus Nerve Stimulation on Human Brown Adipose Tissue Activity                                  | NCT01491282 | Enabling and disabling vagal nervous system |
| STAGES Trial: Study of Adiposity, Growth and Endocrine Stages                                                          | NCT01460784 | Observational                               |
| Dopaminergic Effects on Brown Adipose Tissue                                                                           | NCT02428933 | Bromocriptine                               |
| CB1 Receptors in Human Brown Adipose Tissue                                                                            | NCT02941172 | Observational                               |
| Brown Adipose Tissue and Body Mass Index                                                                               | NCT02173834 | Observational                               |
| Detection of Brown Adipose Tissue by Magnetic Resonance Imaging (BAT_PET/MRI)                                          | NCT02237872 | Observational                               |
| Secretin Activates Human Brown Adipose Tissue.                                                                         | NCT03290846 | Secretin                                    |
| Effects of b3-Adrenergic Receptor Agonists on Brown Adipose Tissue                                                     | NCT01783470 | Mirabegron                                  |
| The Detection and Factors of Brown Adipose Tissue in Different Locations of Adults                                     | NCT01387451 | Observational                               |
| Hyperpolarized Xenon-129 Magnetic Resonance Imaging and Spectroscopy of Brown Fat: Healthy Adult Volunteer Pilot Study | NCT02220426 | Observational                               |
| Mirabegron and Brown Adipose Tissue                                                                                    | NCT03012113 | Mirabegron                                  |
| The Incidence and Factors of Brown Adipose Tissue in Chinese                                                           | NCT01381042 | Observational                               |
| The Incidence, Factors, and Importance of Brown Adipose Tissue in Chinese Adults                                       | NCT01387438 | Observational                               |
| Exenatide and Brown Adipose Tissue (exe01)                                                                             | NCT03002675 | Exenatide                                   |
| Adenosine and A2A Receptors in Human Brown Adipose Tissue                                                              | NCT03327168 | Adenosina                                   |
| The Role of Brown Adipose Tissue in Triglyceride Clearance in People                                                   | NCT02786251 | Observational                               |
| Activation of Cervical and Upper Thoracic Brown Adipose Tissue in Humans Via Beta-adrenergic                           | NCT01015794 | Ephedrine Hydrochloride                     |

|                                                                                                                          |             |                                     |
|--------------------------------------------------------------------------------------------------------------------------|-------------|-------------------------------------|
| Stimulation                                                                                                              |             |                                     |
| Brown Adipose Tissue Activity and Age                                                                                    | NCT02130154 | Observational                       |
| Influence of Liraglutide, a GLP-1 Receptor Agonist, on Brown Adipose Tissue (BAT) Activity in Humans                     | NCT02718950 | Liraglutide                         |
| Brown Fat Activity and Bariatric Surgery                                                                                 | NCT03168009 | Bariatric surgery                   |
| Brown Adipose Tissue Activity in Pre- and Postmenopausal Women                                                           | NCT02927392 | Leuprolide acetate                  |
| The Effect of Brown Adipose Tissue Activation on Insulin Sensitivity in Humans                                           | NCT01791114 | Observational                       |
| GLP-1 Agonism Stimulates Browning of Subcutaneous White Adipose Tissue in ObesityMen                                     | NCT02170324 | Exenatide                           |
| Effects of Sleep Restriction on BAT Activation in Humans                                                                 | NCT02770118 | Sleep deprivation                   |
| Calorie Restriction Retards the Aging Process                                                                            | NCT01508091 | Calorie restriction                 |
| Monounsaturated Fatty Acids and Brown/Beige Adipose Tissue in Humans                                                     | NCT03024359 | Extra virgin olive oil              |
| Brown Adipose Tissue Activity and Thyroid Hormone                                                                        | NCT02499471 | Levothyroxine therapy               |
| Enhancement of Brown Adipose Tissue Function Via Chronic Pharmacological Treatment                                       | NCT02236962 | Placebo, Ephedrine and pioglitazone |
| Activating Brown Adipose Tissue Through Exercise                                                                         | NCT02365129 | Exercise training                   |
| A Role for Brown Adipose Tissue in Postprandial Thermogenesis?                                                           | NCT01974778 | Meal                                |
| Studying the Effect of Capsinoids on Brown FatUsing Infrared Thermal Imaging.                                            | NCT01961674 | Capsinoid/placebo and rice          |
| BRown Fat Activity Measurement With Infrared imaginG tHermography andThermogenesis - the BRIGHT Study                    | NCT02790255 | Observational                       |
| Chronic Intermittent Cold Exposure on Weight Loss                                                                        | NCT01312090 | Whole-body cryotherapy              |
| Efficacy of Pharmacological Stimulation of BAT and WAT in Lean and Obese Young Adults                                    | NCT02354807 | Mirabegron                          |
| Effects of Hyperthyroidism on Amount and Activity of Brown Adipose Tissue                                                | NCT02133040 | Observational                       |
| Collection of Human Tissue Samples From the Neck Region for Characterization of Its Molecular and Biochemical Signatures | NCT02274805 | Observational                       |
| Effects of Estrogen Deficiency on Energy Expenditure                                                                     | NCT01846728 | Estrogen supression                 |
| Leipzig Adipose Tissue Childhood Cohort                                                                                  | NCT02208141 | Observational                       |
| Human Brown Adipose Tissue and Mitochondrial Respiration                                                                 | NCT03111719 | Observational                       |
| Cold Stress Stimulate the Browning of Subcutaneous White Adipose in Healthy Adults                                       | NCT02159144 | Cold stress                         |

|                                                                                                                              |             |                                                 |
|------------------------------------------------------------------------------------------------------------------------------|-------------|-------------------------------------------------|
| Brown Fat Activation Study                                                                                                   | NCT02919176 | Mirabegron and pioglitazone                     |
| Nicotinamide Riboside and Metabolic Health                                                                                   | NCT02835664 | Nicotinamide Riboside (Niagen)                  |
| Sildenafil Activates Browning of White Adipose and Improves Insulin Sensitivity                                              | NCT02524184 | Sildenafil                                      |
| Energy Expenditure Responses to Different Temperatures                                                                       | NCT01568671 | Different temperatures                          |
| Cold Induced Activation of Brown Adipose Tissue in Humans                                                                    | NCT03096535 | Cold stress                                     |
| Correlation of Irisin and Adipokine Levels With Body Mass Index and Risk Factors for Metabolic Syndrome in Hispanic Children | NCT02320110 | Observational                                   |
| Physiological Responses and Adaptation of Brown Adipose Tissue to Chronic Treatment With Beta 3-Adrenergic Receptor Agonists | NCT03049462 | Mirabegron                                      |
| A Cold Physical Treatment to Manage Insulin Resistance                                                                       | NCT02852759 | Selective Cold treatment and Electroacupuncture |

### Supplementary Table 2. Baseline data for clinical variables of middle-aged diabetic subjects

| Variable                                 | Baseline      |
|------------------------------------------|---------------|
| Number of subjects                       | 16            |
| Age, yr                                  | 52 (7,75)     |
| Female sex, %                            | 100           |
| Diabetes, %                              | 100           |
| Weight, kg - Mean (95% CI)               | 83,8 (10,53)  |
| BMI, kg/m <sup>2</sup>                   | 29,3 (4,76)   |
| Glucose, mg/dL - Mean (95% CI)           | 137 (49)      |
| Insulin, mUI/mL - Mean (95% CI)          | 9,8 (7,63)    |
| HbA1C, %                                 | 6,95 (1,75)   |
| HOMA2-IR                                 | 1,33 (1,13)   |
| BAT volume, mL - Mean (95% CI)           | 6,2(14,21)    |
| SUV <sub>lean/mean</sub> , g/mL          | 2,18 (0,49)   |
| SUV <sub>lean/max</sub> , g/mL           | 3,46 (2,24)   |
| SUV <sub>lean/peak</sub> , g/mL          | 2,86 (1,96)   |
| LDL cholesterol, mg/dL -Mean (95% CI)    | 121 (52,75)   |
| HDL cholesterol, mg/dL - Mean (95% CI)   | 37,5 (13,25)  |
| Triglycerides, mg/dL - Mean (95% CI)     | 121,5 (91,75) |
| Total cholesterol, mg/dL - Mean (95% CI) | 199 (59,75)   |

To convert glucose to millimoles per liter, multiplies by 0.01129. Lean body mass was obtained using pletismography for correction of SUV in PET imaging. To convert cholesterol to millimoles per liter, multiplies by 0.02586. To convert triglycerides to millimoles per liter, multiplies by 0.01129. CI, confidence interval; SUV, standardized uptake value; LDL, low-density lipoprotein; HDL, high-density lipoprotein.

**Supplementary Table 3. Unadjusted baseline and 1-year follow-up for clinical variables**

| <b>Variable</b>                           | <b>Before surgery</b>       | <b>After surgery</b>         |
|-------------------------------------------|-----------------------------|------------------------------|
| Age, yr                                   | 36.2<br>(32.7 – 39.8)       | 37.5<br>(34.0 – 41.1)        |
| Female sex, %                             | 100                         | 100                          |
| Weight, kg<br>Mean (95% CI)               | 108.41<br>(100.66 – 116.16) | 80.48***<br>(76.85 – 84.11)  |
| Change from baseline, %<br>Mean (95% CI)  |                             | -25.90<br>(-30.54 - -21.26)  |
| Glucose, mg/dL<br>Mean (95% CI)           | 91.56<br>(82.78 – 100.34)   | 77.72***<br>(71.27 – 84.19)  |
| Insulin, mUI/mL<br>Mean (95% CI)          | 17.21<br>(11.05 – 23.39)    | 4.69**<br>(2.88 – 6.51)      |
| M-value 120-180<br>Mean (95% CI)          | 2.95<br>(2.30 – 3.60)       | 7.13**<br>(5.30 – 8.98)      |
| SUV, g/mL<br>Mean (95% CI)                | 2.88<br>(-0.60 – 7.33)      | 4.65<br>(0.68 – 8.64)        |
| LDL cholesterol, mg/dL<br>Mean (95% CI)   | 107<br>(85.80 – 128.20)     | 75.73*<br>(54.88 – 96.59)    |
| HDL cholesterol, mg/dL<br>Mean (95% CI)   | 45<br>(40.11 – 49.90)       | 51.73<br>(40.59 – 62.88)     |
| Triglycerides, mg/dL<br>Mean (95% CI)     | 83.11<br>(53.69 – 112.54)   | 66<br>(47.57 – 84.43)        |
| Total cholesterol, mg/dL<br>Mean (95% CI) | 169.78<br>(149.85 – 189.70) | 139.55*<br>(117.88 – 157.22) |
| CRP, mg/dL<br>Mean (95% CI)               | 18.33<br>(-14.63 – 51.28)   | 4.09**<br>(-2.14 – 10.30)    |

All patients were submitted to RYGB. The sample size does not include data from patients who lost follow-up. We performed Wilcoxon matched-pairs signed rank test. No adjustments were performed for multiple comparisons. To convert glucose to millimoles per liter, multiplies by 0.01129. To convert cholesterol to millimoles per liter, multiplies by 0.02586. To convert triglycerides to millimoles per liter, multiplies by 0.01129. CI, confidence interval; SUV, standardized uptake value; LDL, low-density lipoprotein; HDL, high-density lipoprotein. \*p<0,05, \*\*p<0,01, \*\*\*p<0,001

Unspliced immunoblot images used in this study and raw data analysis

Figure 4G – Opa1

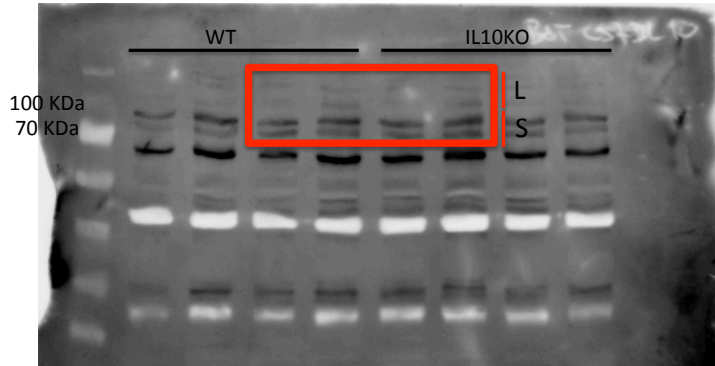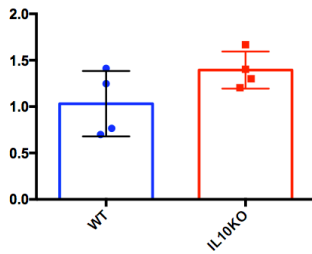

| OPA1 ratio to longer form |          |            | Unpaired t test with equal SD |            |
|---------------------------|----------|------------|-------------------------------|------------|
| wt - long                 | wt short |            |                               | A          |
| 23962                     | 18351    | 0,76583758 | 1                             | Data Set-A |
| 30650                     | 21412    | 0,69859706 | 2                             | Y          |
| 20414                     | 28819    | 1,41172725 | 3                             | Opa1-S/L   |
| 28646                     | 35749    | 1,24795783 | 4                             | IL10KO     |
|                           |          |            | 5                             | vs.        |
|                           |          |            | 6                             | vs.        |
|                           |          |            | 7                             | WT         |
|                           |          |            | 8                             |            |
|                           |          |            | 9                             |            |
|                           |          |            | 10                            |            |
|                           |          |            | 11                            |            |
|                           |          |            | 12                            |            |
|                           |          |            | 13                            |            |

  

| KO - long | ko short |            |    |                                     |
|-----------|----------|------------|----|-------------------------------------|
| 19718     | 32877    | 1,66735977 | 1  | Table Analyzed                      |
| 30101     | 39168    | 1,30121923 | 2  |                                     |
| 14690     | 20607    | 1,40279101 | 3  | Column B                            |
| 19057     | 22940    | 1,20375715 | 4  | vs.                                 |
|           |          |            | 5  | Column A                            |
|           |          |            | 6  |                                     |
|           |          |            | 7  | Unpaired t test                     |
|           |          |            | 8  | P value                             |
|           |          |            | 9  | P value summary                     |
|           |          |            | 10 | Significantly different? (P < 0.05) |
|           |          |            | 11 | One- or two-tailed P value?         |
|           |          |            | 12 | t, df                               |
|           |          |            | 13 |                                     |

FIGURE 4 G – Mfn2

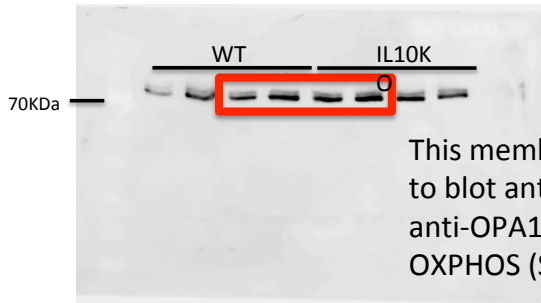

This membrane was stripped to blot anti-UCP1 (Supp. Fig. 3E), anti-OPA1 (Fig. 4H), TFAM and OXPHOS (Supp. Fig. 6 A).

Ponceau

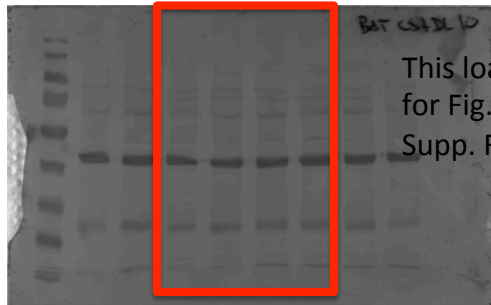

This load control was used for Fig. 4H, Supp. Fig. 3E and Supp. Fig. 6 A.

| Unpaired t test with equal SD |                                     | A                   |
|-------------------------------|-------------------------------------|---------------------|
|                               |                                     | Data Set-A          |
|                               |                                     | Y                   |
| 1                             | Table Analyzed                      | Mfn2                |
| 2                             |                                     |                     |
| 3                             | Column B                            | IL10KO              |
| 4                             | vs.                                 | vs.                 |
| 5                             | Column A                            | WT                  |
| 6                             |                                     |                     |
| 7                             | Unpaired t test                     |                     |
| 8                             | P value                             | 0.4181              |
| 9                             | P value summary                     | ns                  |
| 10                            | Significantly different? (P < 0.05) | No                  |
| 11                            | One- or two-tailed P value?         | Two-tailed          |
| 12                            | t, df                               | t=0.8693 df=6       |
| 13                            |                                     |                     |
| 14                            | How big is the difference?          |                     |
| 15                            | Mean ± SEM of column A              | 0.7318 ± 0.1633 N=4 |
| 16                            | Mean ± SEM of column B              | 0.4950 ± 0.2179 N=4 |
| 17                            | Difference between means            | -0.2367 ± 0.2723    |
| 18                            | 95% confidence interval             | -0.9031 to 0.4296   |
| 19                            | R squared                           | 0.1119              |
| 20                            |                                     |                     |
| 21                            | F test to compare variances         |                     |
| 22                            | F,DFn, Dfd                          | 1.782, 3, 3         |
| 23                            | P value                             | 0.6470              |
| 24                            | P value summary                     | ns                  |
| 25                            | Significantly different? (P < 0.05) | No                  |

| H18 |         |           |    |         |                |             |   |
|-----|---------|-----------|----|---------|----------------|-------------|---|
|     | A       | B         | C  | D       | E              | F           | G |
| 1   | Mfn2    |           |    |         |                |             |   |
| 2   |         |           |    |         |                |             |   |
| 3   |         |           |    |         |                |             |   |
| 4   | Segment | Area      |    | Ponceau | Area_all peak: | Mfn_Ponceau |   |
| 5   | 1       | 2.037.548 | wt | wt      | 5.834.644      | 0.34921548  |   |
| 6   | 2       | 4.650.711 | wt | wt      | 7.114.905      | 0.6536575   |   |
| 7   | 3       | 3.839.468 | wt | wt      | 4.879.451      | 0.78686475  |   |
| 8   | 4       | 5.583.317 | wt | wt      | 4.909.358      | 1,13728048  |   |
| 9   | 5       | 881.284   | ko | ko      | 5.369.188      | 0,1641373   |   |
| 10  | 6       | 1.702.719 | ko | ko      | 5.894.673      | 0,28885724  |   |
| 11  | 7       | 2.045.355 | ko | ko      | 5.197.480      | 0,39352821  |   |
| 12  | 8       | 6.021.447 | ko | ko      | 5.312.066      | 1,13354145  |   |
| 13  |         |           |    |         |                |             |   |
| 14  |         |           |    |         |                |             |   |
| 15  |         |           |    |         |                |             |   |
| 16  |         |           |    |         |                |             |   |



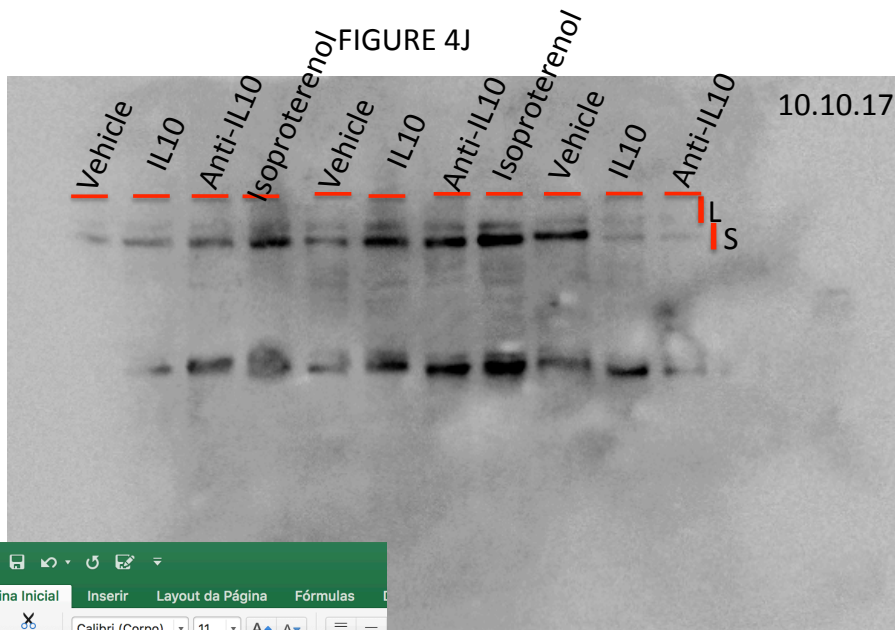

|    | A             | B | C            | D             | E | F        | G |
|----|---------------|---|--------------|---------------|---|----------|---|
| 1  |               |   |              |               |   |          |   |
| 2  |               |   | Long isoform | Short isoform |   |          |   |
| 3  | Veh           |   | 37           | 37            |   | 1        |   |
| 4  | IL10          |   | 1277         | 2098          |   | 1,642913 |   |
| 5  | Anti-IL10     |   | 4667         | 8864          |   | 1,899293 |   |
| 6  | Isoproterenol |   | 13529        | 33379         |   | 2,467219 |   |
| 7  | Veh           |   | 7108         | 10993         |   | 1,546567 |   |
| 8  | IL10          |   | 14151        | 38274         |   | 2,704685 |   |
| 9  | Anti-IL10     |   | 11068        | 34662         |   | 3,131731 |   |
| 10 | Isoproterenol |   | 10455        | 44830         |   | 4,287901 |   |
| 11 | Veh           |   | 11145        | 32359         |   | 2,903454 |   |
| 12 | IL10          |   | 4608         | 1642          |   | 0,356337 |   |
| 13 | Anti-IL10     |   | 947          | 0             |   | 0        |   |
| 14 | Isoproterenol |   |              |               |   |          |   |
| 15 |               |   |              |               |   |          |   |
| 16 |               |   |              |               |   |          |   |
| 17 |               |   |              |               |   |          |   |

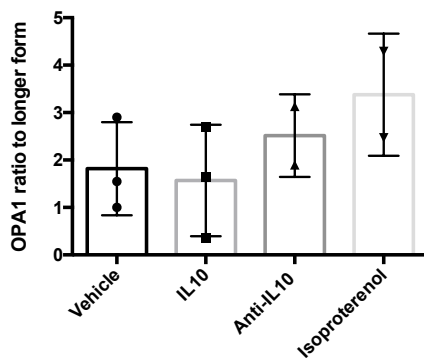

| Ordinary one-way ANOVA |                                                                   | A          | B          |
|------------------------|-------------------------------------------------------------------|------------|------------|
|                        |                                                                   | Data Set-A | Data Set-B |
|                        |                                                                   | Y          | Y          |
| 1                      | Table Analyzed                                                    | Data 1     |            |
| 2                      |                                                                   |            |            |
| 3                      | ANOVA summary                                                     |            |            |
| 4                      | F                                                                 | 1.298      |            |
| 5                      | P value                                                           | 0.3582     |            |
| 6                      | P value summary                                                   | ns         |            |
| 7                      | Are differences among means statistically significant? (P < 0.05) | No         |            |
| 8                      | R square                                                          | 0.3936     |            |
| 9                      |                                                                   |            |            |

SUPP. FIG. 3F

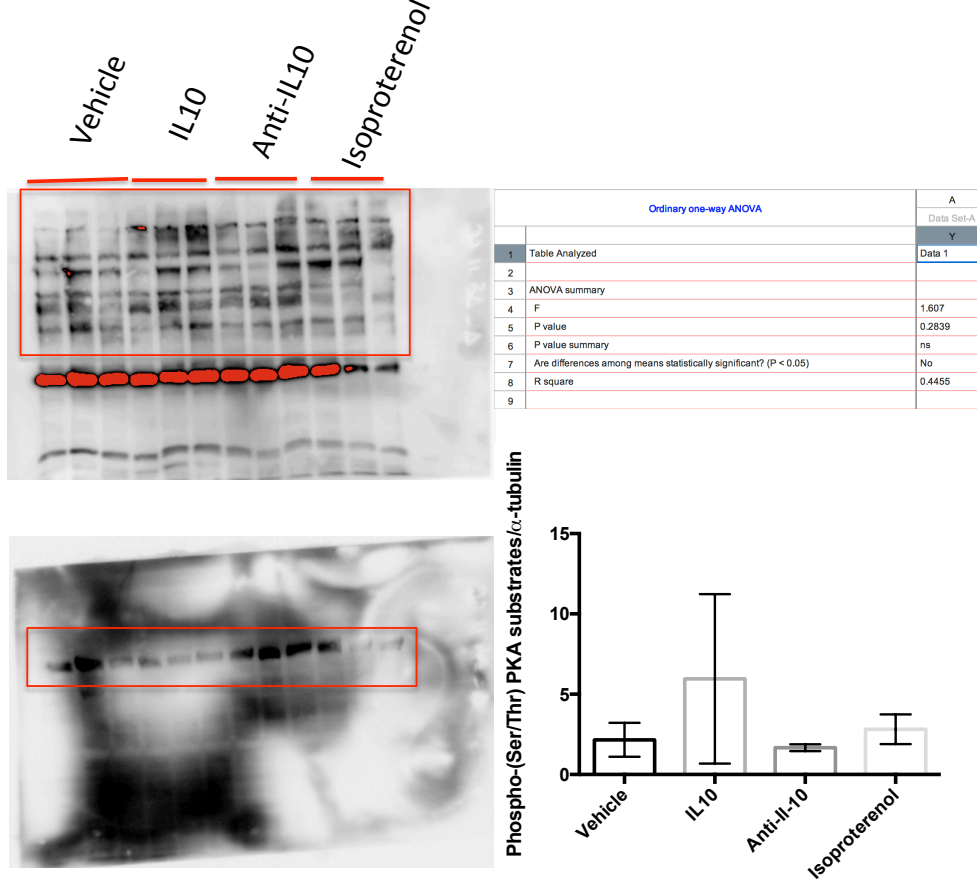

| Ordinary one-way ANOVA |                                                                   | A      |
|------------------------|-------------------------------------------------------------------|--------|
| 1                      | Table Analyzed                                                    | Data 1 |
| 2                      |                                                                   |        |
| 3                      | ANOVA summary                                                     |        |
| 4                      | F                                                                 | 1.607  |
| 5                      | P value                                                           | 0.2839 |
| 6                      | P value summary                                                   | ns     |
| 7                      | Are differences among means statistically significant? (P < 0.05) | No     |
| 8                      | R square                                                          | 0.4455 |
| 9                      |                                                                   |        |

| K         | L          | M          | N          | O          | P          | Q          | R          | S          | T          | U          | V          | W             |
|-----------|------------|------------|------------|------------|------------|------------|------------|------------|------------|------------|------------|---------------|
| lane 1    | 2          | 3          | 4          | 5          | 6          | 7          | 8          | 9          | 10         | 11         | 12         |               |
| 134.971   | 337.406    | 173.263    | 1.965.355  |            | 273.506    | 540.406    | 606.577    |            | 744.577    | 598.627    | 447.042    |               |
| 1.605.962 | 1.527.083  | 1.133.648  | 1.848.012  | 395.991    | 1.587.861  | 856.355    | 1.417.841  | 504.627    | 207.920    | 359.335    | 1.450.154  |               |
| 1.005.598 | 3.834.740  | 1.518.719  | 615.284    | 684.598    | 2.350.134  | 992.305    | 299.092    | 1.962.012  | 1.198.527  | 1.080.184  | 674.991    |               |
| 590.770   | 1.065.255  | 518.062    | 725.012    | 3.324.326  | 800.770    | 634.891    | 359.163    | 2.065.891  | 3.983.326  | 2.429.790  | 269.021    |               |
| 1.736.719 | 1.171.234  | 279.435    | 2.013.912  | 698.577    | 1.288.234  | 979.891    | 2.152.497  | 375.627    | 232.092    | 366.506    |            |               |
| 1.096.012 | 2.780.690  | 599.456    | 259.971    | 1.895.719  | 1.632.598  | 480.820    | 643.941    | 1.986.861  | 836.820    | 445.163    |            |               |
|           |            |            |            | 1.204.376  |            |            |            | 238.971    |            |            |            |               |
| 6.170.032 | 10.716.408 | 4.222.583  | 7.427.546  | 8.203.587  | 7.933.103  | 4.484.668  | 5.479.111  | 7.133.989  | 7.203.262  | 5.279.605  | 2.841.208  | PKA           |
| 2.354.083 | 3.685.861  | 4.411.317  | 3.333.276  | 220.092    | 819.355    | 2.354.083  | 3.685.861  | 4.411.317  | 3.333.276  | 220.092    | 819.062    | alfa-tubulina |
| 2,6209917 | 2,90743682 | 0,95721595 | 2,22830213 | 37,2734447 | 9,68213168 | 1,90505942 | 1,48652133 | 1,61720162 | 2,16101577 | 23,9881731 | 3,46885584 |               |

SUPP. FIG. 4D-4E

UCP1

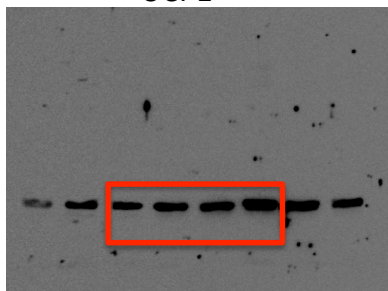

Ponceau

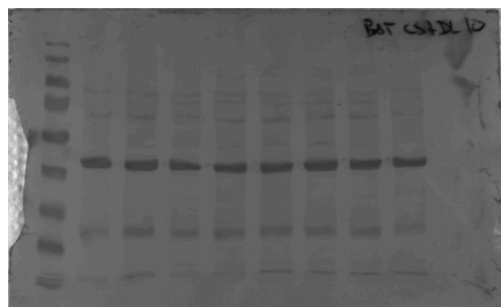

|    | A                                                             | B | C | D               | E     | F       | G             | H       | I           | J        | K        | L        | M        | N        | O        | P           | Q                  |  |                                                    |  |
|----|---------------------------------------------------------------|---|---|-----------------|-------|---------|---------------|---------|-------------|----------|----------|----------|----------|----------|----------|-------------|--------------------|--|----------------------------------------------------|--|
| 1  | UCP1 per mg protein - specific UCP1 content per 20 micrograms |   |   |                 |       |         |               |         |             |          |          |          |          |          |          |             | UCP1 per mg tissue |  | UCP1 per depot (total protein*ucp1 per mg protein) |  |
| 2  |                                                               |   |   | c57             | il10  |         |               | c57     | il10        | normal   |          |          | c57      | il10     |          |             |                    |  |                                                    |  |
| 3  |                                                               |   |   | 19396           | 65904 | 969800  |               | 3295200 | 236536,6    | 983641,8 | 0,439589 | 1,828038 | 300974,6 | 563825,8 | 0,626369 | 1,173398645 |                    |  |                                                    |  |
| 4  |                                                               |   |   | 51531           | 85688 | 2576550 |               | 4284400 | 620855,4    | 1278925  | 1,153822 | 2,376804 | 445996,7 | 874600,1 | 0,92818  | 1,820162616 |                    |  |                                                    |  |
| 5  | 20 micrograms = 0,02 mg                                       |   |   | 48684           | 73581 | 2434200 |               | 3679050 | 547011,2    | 1794659  | 1,016587 | 3,335263 | 510770,5 | 867834,1 | 1,062983 | 1,806081648 |                    |  |                                                    |  |
| 6  |                                                               |   |   | 63575           | 51089 | 3178750 |               | 2554450 | 747941,2    | 654987,2 | 1,390003 | 1,217253 | 664284,6 | 380708,1 | 1,382467 | 0,792305597 |                    |  |                                                    |  |
| 7  | Conteúdo proteico em um lane:                                 |   |   |                 |       |         |               |         |             |          |          |          |          |          |          |             |                    |  |                                                    |  |
| 8  | 0,02                                                          |   |   |                 |       |         |               |         |             |          |          |          |          |          |          |             |                    |  |                                                    |  |
| 9  |                                                               |   |   |                 |       |         |               |         |             |          |          |          |          |          |          |             |                    |  |                                                    |  |
| 10 |                                                               |   |   | IBAT wet weight |       |         | total protein |         |             |          |          |          |          |          |          |             |                    |  |                                                    |  |
| 11 |                                                               |   |   | CS7             | IL-10 |         | il            | CS7     |             | IL-10    |          |          |          |          |          |             |                    |  |                                                    |  |
| 12 |                                                               |   |   | 0,082           | 0,067 | 82      | 67            |         | 15,51735184 | 8,555259 |          |          |          |          |          |             |                    |  |                                                    |  |
| 13 |                                                               |   |   | 0,083           | 0,067 | 83      | 67            |         | 8,854920804 | 10,2098  |          |          |          |          |          |             |                    |  |                                                    |  |
| 14 |                                                               |   |   | 0,089           | 0,041 | 89      | 41            |         | 10,49154654 | 11,79427 |          |          |          |          |          |             |                    |  |                                                    |  |
| 15 |                                                               |   |   | 0,085           | 0,078 | 85      | 78            |         | 10,44683431 | 7,45186  |          |          |          |          |          |             |                    |  |                                                    |  |
| 16 |                                                               |   |   |                 |       |         |               |         |             |          |          |          |          |          |          |             |                    |  |                                                    |  |
| 17 |                                                               |   |   |                 |       |         |               |         |             |          |          |          |          |          |          |             |                    |  |                                                    |  |
| 18 |                                                               |   |   |                 |       |         |               |         |             |          |          |          |          |          |          |             |                    |  |                                                    |  |

  

| Mann-Whitney test |                                     | A                          |  | Y          |                                     | Mann-Whitney test      |  | A          |                                     |
|-------------------|-------------------------------------|----------------------------|--|------------|-------------------------------------|------------------------|--|------------|-------------------------------------|
| Data Set-A        |                                     | Y                          |  | Data Set-A |                                     | Y                      |  | Data Set-A |                                     |
| 1                 | Table Analyzed                      | Total UCP1 protein per BAT |  | 1          | Table Analyzed                      | tissue weight          |  | 1          | Table Analyzed                      |
| 2                 | Column A                            | WT                         |  | 2          | Column A                            | IL10 KO                |  | 2          | Column A                            |
| 3                 | vs.                                 | vs.                        |  | 3          | vs.                                 | vs.                    |  | 3          | Column B                            |
| 4                 | Column B                            | IL10 KO                    |  | 4          | Column B                            | WT                     |  | 4          | vs.                                 |
| 5                 | Mann-Whitney test                   |                            |  | 5          | Unpaired t test                     |                        |  | 5          | Column B                            |
| 6                 | P value                             | 0.3429                     |  | 6          | P value                             | 0.0363                 |  | 6          | IL10 KO                             |
| 7                 | Exact or approximate P value?       | Exact                      |  | 7          | P value summary                     | *                      |  | 7          |                                     |
| 8                 | P value summary                     | ns                         |  | 8          | Significantly different? (P < 0.05) | Yes                    |  | 8          | Mann-Whitney test                   |
| 9                 | Significantly different? (P < 0.05) | No                         |  | 9          | One- or two-tailed P value?         | Two-tailed             |  | 9          | P value                             |
| 10                | One- or two-tailed P value?         | Two-tailed                 |  | 10         | t, df                               | t=2.685 df=6           |  | 10         | Exact or approximate P value?       |
| 11                | Sum of ranks in column A,B          | 14.00, 22.00               |  | 11         | How big is the difference?          |                        |  | 11         | P value summary                     |
| 12                | Mann-Whitney U                      | 4.000                      |  | 12         | Mean ± SEM of column A              | 0.06325 ± 0.007857 N=4 |  | 12         | Significantly different? (P < 0.05) |
| 13                | Difference between medians          | 0.9566                     |  | 13         | Mean ± SEM of column B              | 0.08475 ± 0.001548 N=4 |  | 13         | One- or two-tailed P value?         |
| 14                | Median of column A                  | 1.490                      |  | 14         | Difference between means            | -0.0215 ± 0.008008     |  | 14         | Sum of ranks in column A,B          |
| 15                | Median of column B                  | 1.490                      |  | 15         | 95% confidence interval             | -0.04109 to -0.001905  |  | 15         | Mann-Whitney U                      |
| 16                | Difference-Actual                   | -0.4942                    |  | 16         | R squared                           | 0.5457                 |  | 16         |                                     |
| 17                | Difference-Hodges-Lehmann           | -0.4307                    |  | 17         |                                     |                        |  | 17         |                                     |
